# Supplementary material for: Cyclometalated luminescent platinum(ii) complexes of dissymmetrical 2,2′:4′,2′′-terpyridine and its self-assembled dimer presenting Pt–Ag dative bonds
Source: Royal Society of Chemistry journal article supplement (doi:10.1039/d4dt01153h), 2024-01-01
Supplement: d4dt01153h1.pdf [file d4dt01153h1.pdf]

## Supporting Information

### **Cyclometalated luminescent platinum(II) complexes of dissymmetrical 2,2':4',2''-terpyridine and its self-assembled dimer presenting Pt-Ag dative bonds**

Lorien Benda,<sup>a‡</sup> Louise Miton,<sup>a‡</sup> Nihal Hadj Seyd,<sup>a</sup> Lise-Marie Chamoreau,<sup>a</sup> Gediminas Jonusauskas,<sup>b</sup> Nathan D. McClenaghan,<sup>b</sup> Bernold Hasenknopf,<sup>a</sup> Valérie Marvaud,<sup>a</sup> and  
Guillaume Vives\*

#### Table of contents

|                                 |    |
|---------------------------------|----|
| X-ray crystallography data..... | 2  |
| Supplementary Scheme .....      | 3  |
| Supplementary Figures .....     | 4  |
| NMR spectra of compound.....    | 14 |

## X-ray crystallography data

|                                                |                                                              |                                                            |
|------------------------------------------------|--------------------------------------------------------------|------------------------------------------------------------|
| Identification code                            | 3                                                            | 5                                                          |
| Empirical formula                              | $C_{87.5}H_{97.5}AgCl_{7.5}F_9N_{10}O_9Pt_2S_3$              | $C_{21}H_{21}N_4ClPt$                                      |
| Formula weight                                 | 2464.35                                                      | 559.96                                                     |
| Temperature/K                                  | 200                                                          | 200(1)                                                     |
| Crystal system                                 | monoclinic                                                   | monoclinic                                                 |
| Space group                                    | $P2_1/n$                                                     | $P2_1/m$                                                   |
| a/Å                                            | 15.4562(9)                                                   | 12.6144(9)                                                 |
| b/Å                                            | 42.508(3)                                                    | 6.7077(4)                                                  |
| c/Å                                            | 15.6202(12)                                                  | 12.6960(8)                                                 |
| $\alpha/^\circ$                                | 90                                                           | 90                                                         |
| $\beta/^\circ$                                 | 105.542(4)                                                   | 106.728(4)                                                 |
| $\gamma/^\circ$                                | 90                                                           | 90                                                         |
| Volume/Å <sup>3</sup>                          | 9887.5(12)                                                   | 1028.79(12)                                                |
| Z                                              | 4                                                            | 2                                                          |
| $\rho_{calc}/cm^3$                             | 1.655                                                        | 1.808                                                      |
| $\mu/mm^{-1}$                                  | 9.854                                                        | 6.962                                                      |
| F(000)                                         | 4896.0                                                       | 540.0                                                      |
| Crystal size/mm <sup>3</sup>                   | $0.15 \times 0.02 \times 0.02$                               | $0.45 \times 0.15 \times 0.02$                             |
| Radiation                                      | CuK $\alpha$ ( $\lambda = 1.54178$ )                         | MoK $\alpha$ ( $\lambda = 0.71073$ )                       |
| 2 $\Theta$ range for data collection/ $^\circ$ | 7.198 to 94.526                                              | 5.394 to 61.116                                            |
| Index ranges                                   | $-14 \leq h \leq 14, -40 \leq k \leq 40, -14 \leq l \leq 12$ | $-17 \leq h \leq 17, -9 \leq k \leq 9, -18 \leq l \leq 18$ |
| Reflections collected                          | 36015                                                        | 29225                                                      |
| Independent reflections                        | 8823 [ $R_{int} = 0.1455, R_{sigma} = 0.1398$ ]              | 29225 [ $R_{int} = 0.0560, R_{sigma} = 0.0751$ ]           |
| Data/restraints/parameters                     | 8823/53/600                                                  | 29225/0/161                                                |
| Goodness-of-fit on F <sup>2</sup>              | 1.052                                                        | 1.111                                                      |
| Final R indexes [ $I \geq 2\sigma(I)$ ]        | $R_1 = 0.1270, wR_2 = 0.2911$                                | $R_1 = 0.0558, wR_2 = 0.1227$                              |
| Final R indexes [all data]                     | $R_1 = 0.1900, wR_2 = 0.3264$                                | $R_1 = 0.0706, wR_2 = 0.1294$                              |
| Largest diff. peak/hole/e Å <sup>-3</sup>      | 2.22/-1.79                                                   | 5.35/-3.75                                                 |
| CCDC number                                    | 2339432                                                      | 2339433                                                    |

## Supplementary Scheme

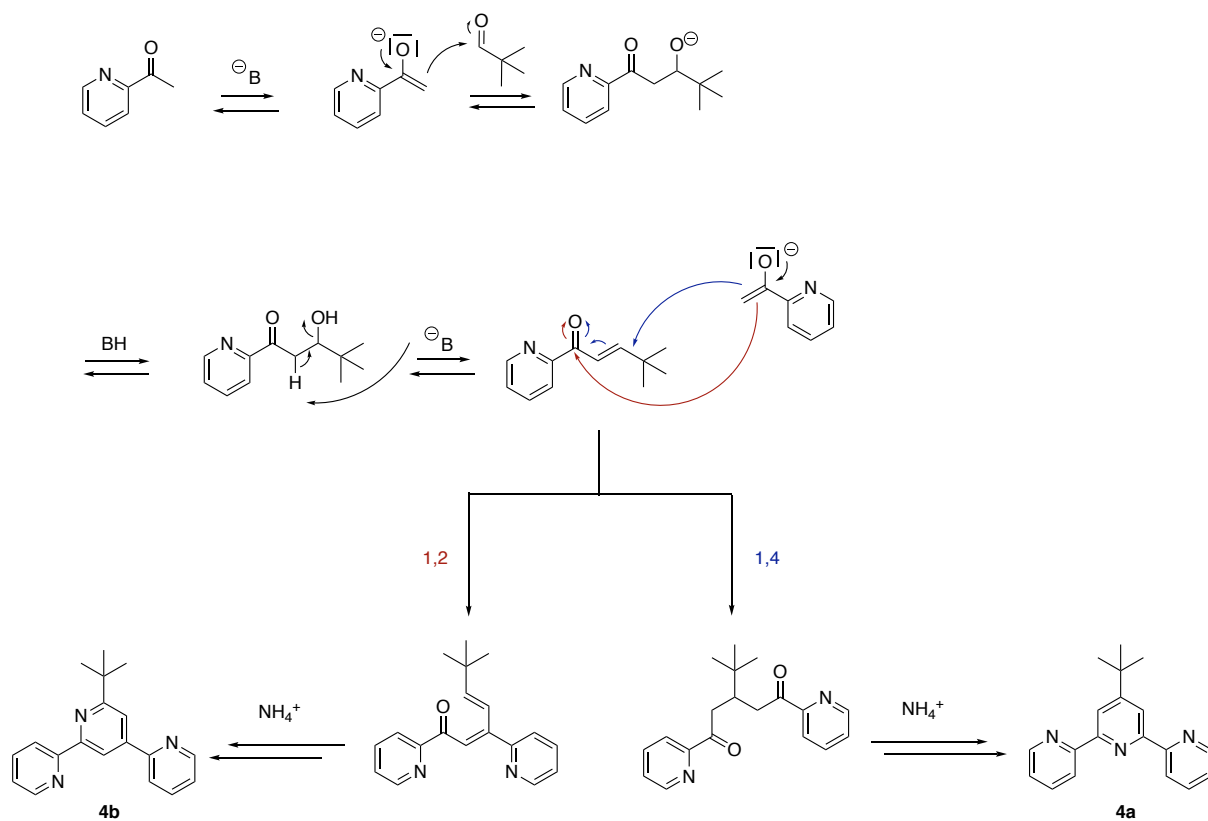

Scheme S1. Proposed mechanism for the formation of terpyridine **4a** and **4b**.

## Supplementary Figures

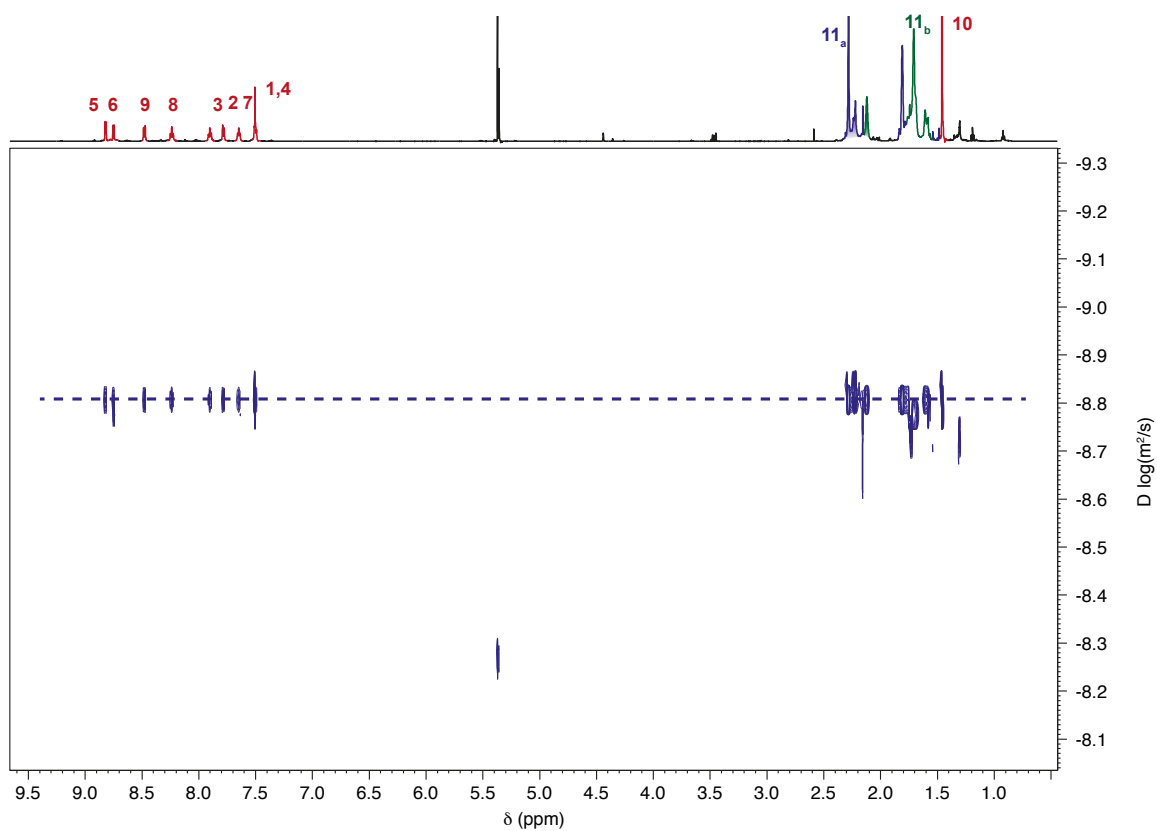

Figure S1.  $^1\text{H}$  NMR DOSY Spectra (600 MHz,  $\text{CD}_2\text{Cl}_2$ , 300K) of complex **2**.

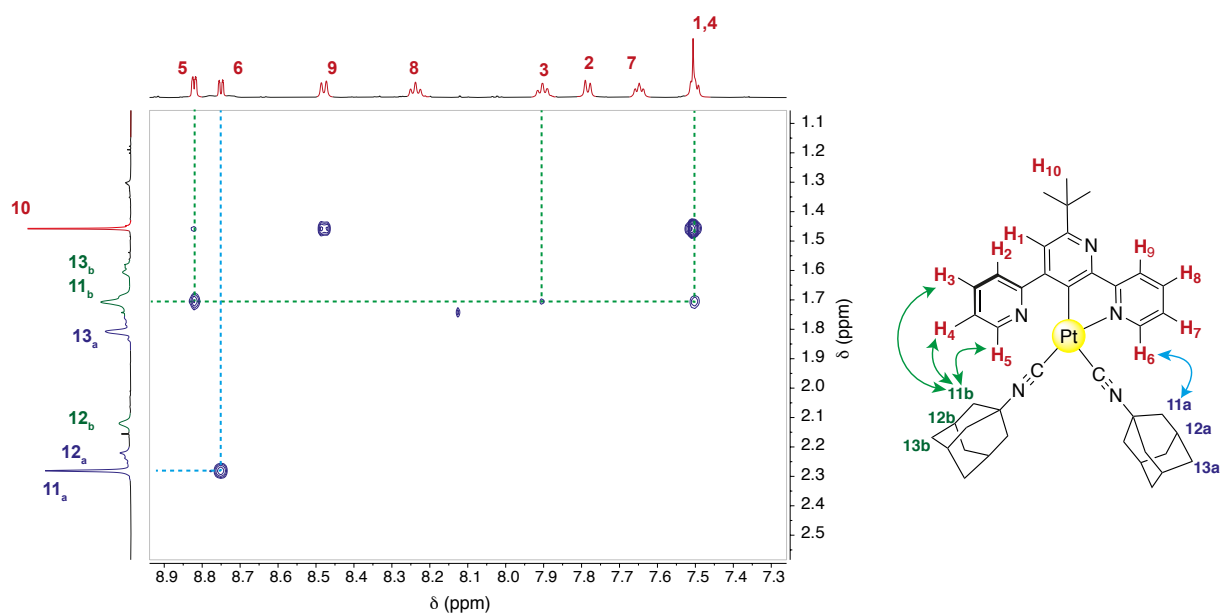

Figure S2. Partial  $^1\text{H}$  NMR NOESY Spectra (600 MHz,  $\text{CD}_2\text{Cl}_2$ , 300K) of complex **2** showing the regioselectivity of the pyridine decoordination.

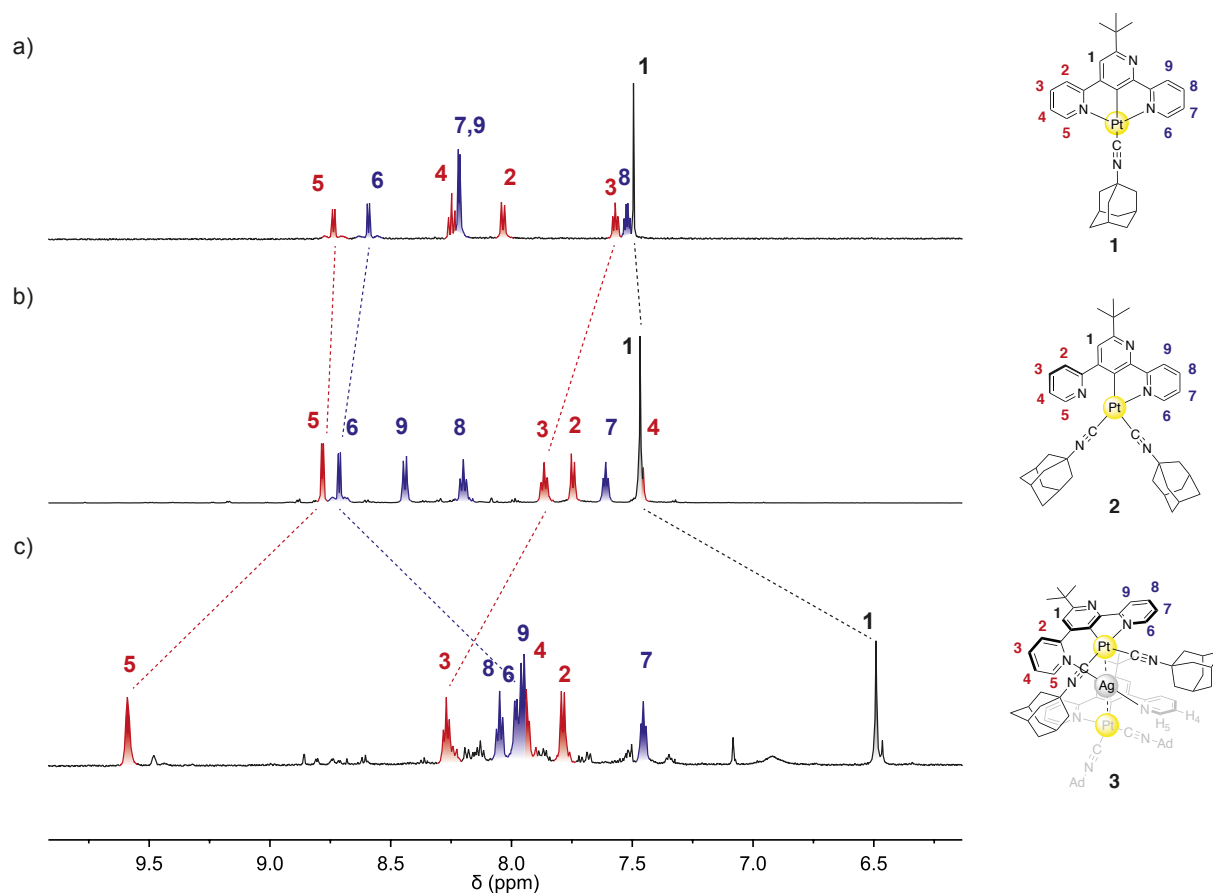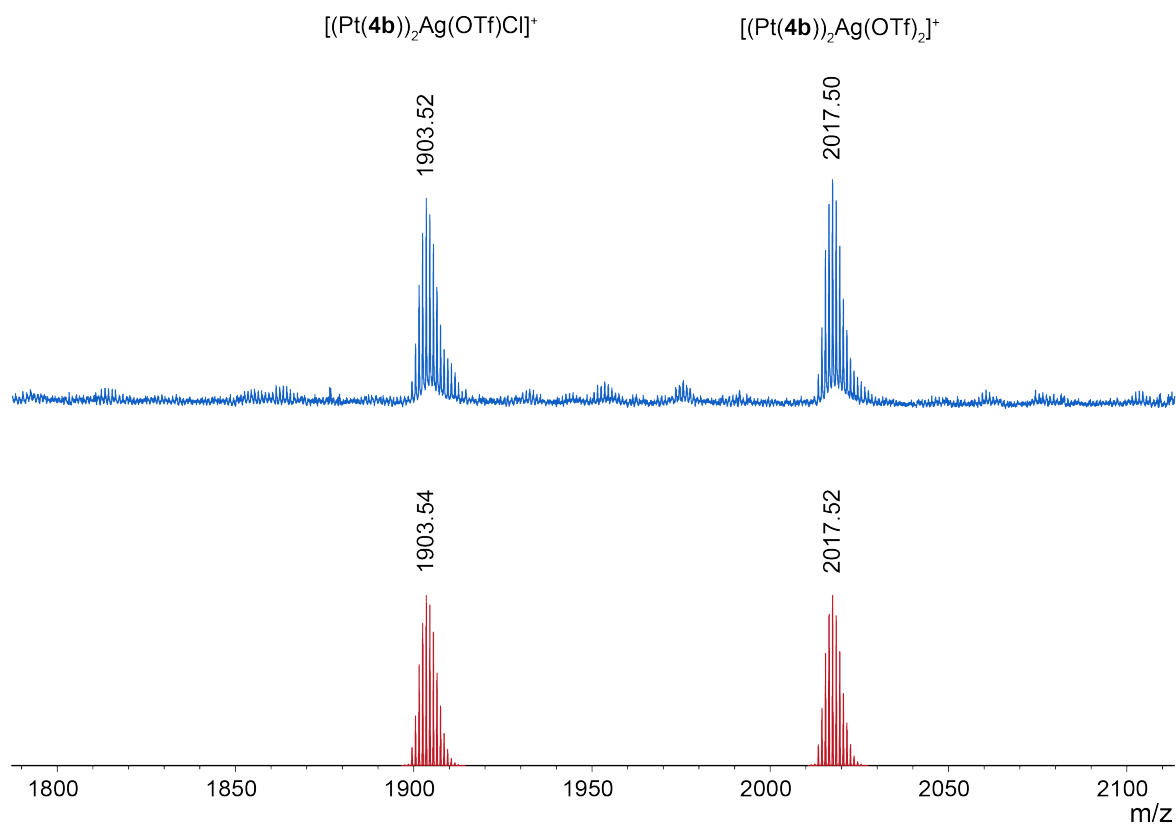

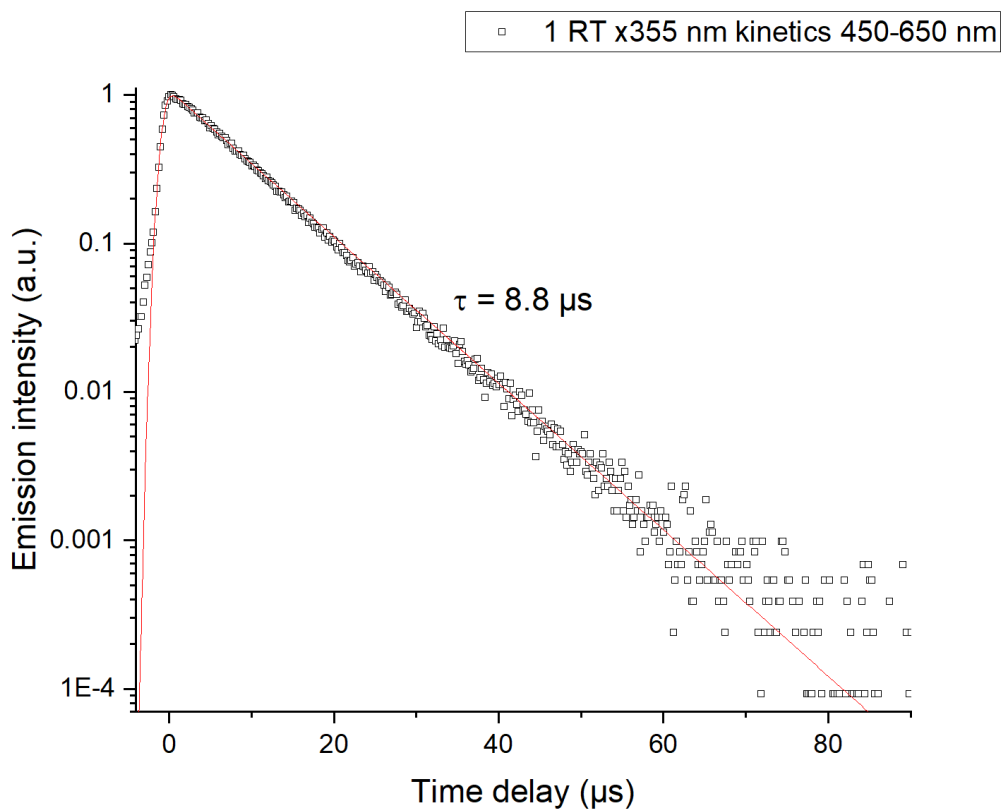

Figure S5. Luminescence decay for **1** in degassed dry  $\text{CHCl}_3$  at 293 K ( $\lambda_{\text{ex}}=355$  nm).

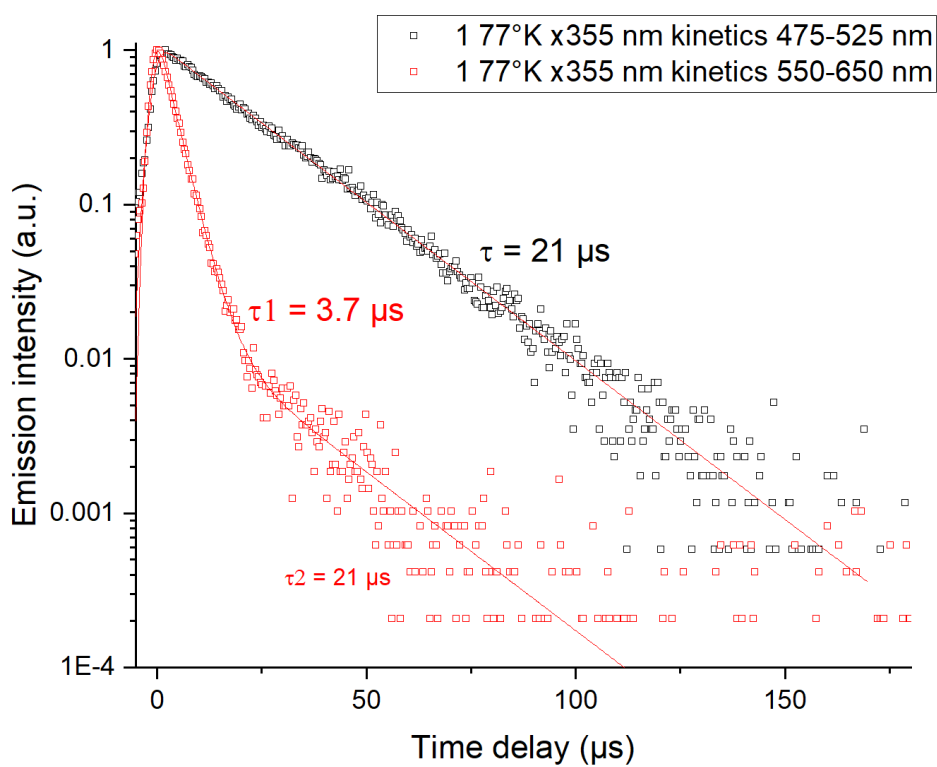

Figure S6. Luminescence decay for **1** in degassed dry  $\text{CHCl}_3$  at 77 K ( $\lambda_{\text{ex}}=355$  nm).

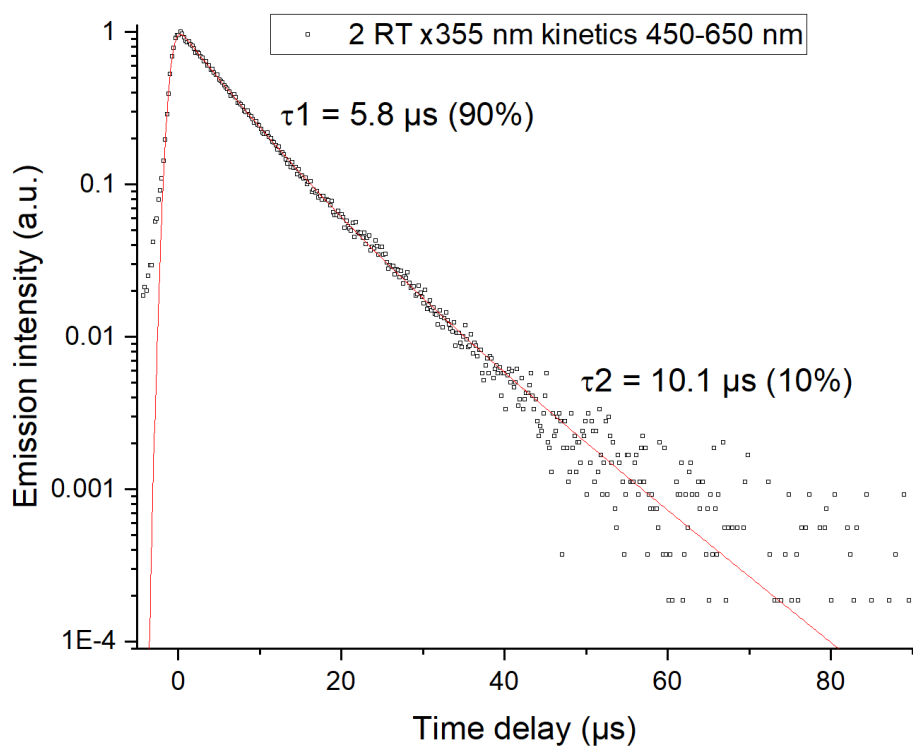

Figure S7. Luminescence decay for **2** in degassed dry  $\text{CHCl}_3$  at 293 K ( $\lambda_{\text{ex}}=355$  nm).

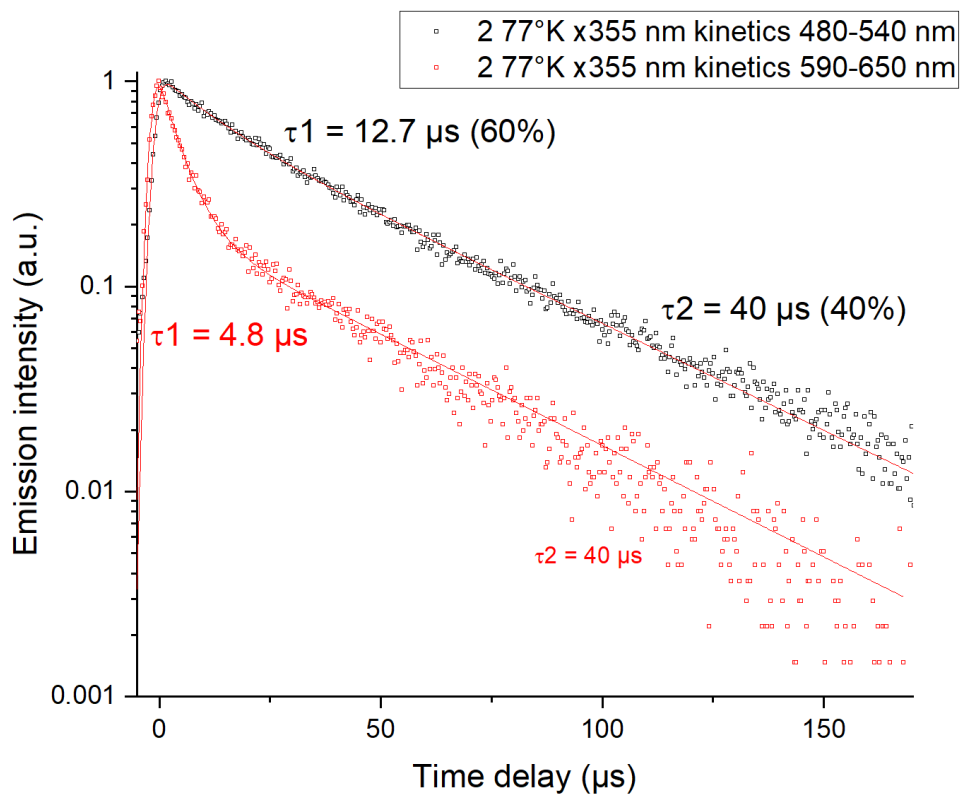

Figure S8. Luminescence decay for **2** in degassed dry  $\text{CHCl}_3$  at 77 K ( $\lambda_{\text{ex}}=355$  nm).

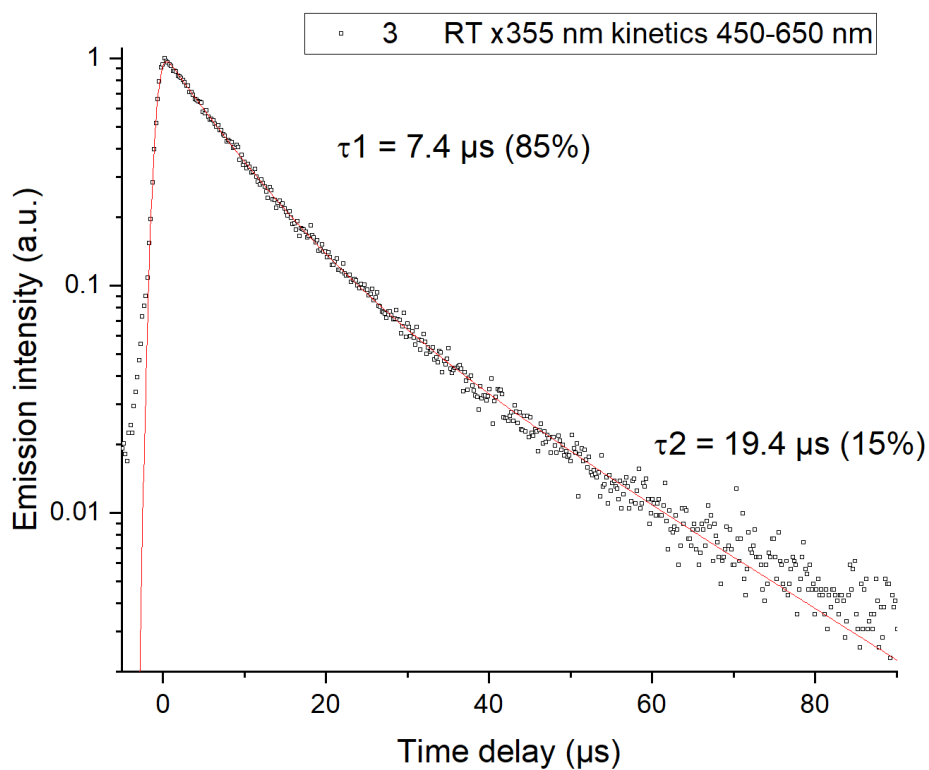

Figure S9. Luminescence decay for **3** in degassed dry  $\text{CHCl}_3$  at 293 K ( $\lambda_{\text{ex}}=355 \text{ nm}$ ).

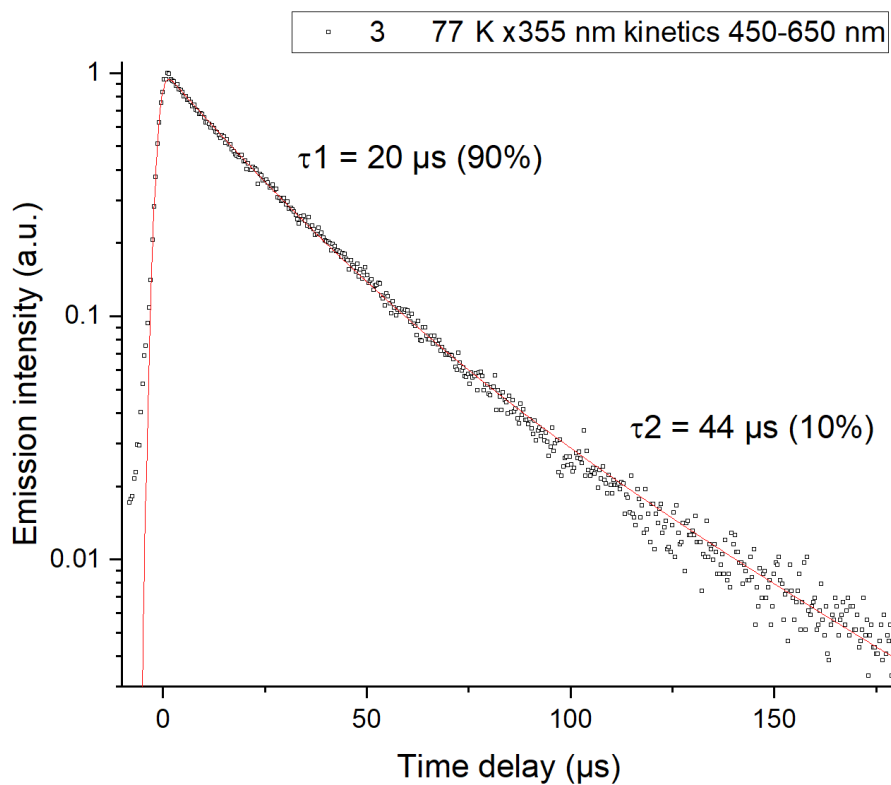

Figure S10. Luminescence decay for **3** in degassed dry  $\text{CHCl}_3$  at 77 K ( $\lambda_{\text{ex}}=355 \text{ nm}$ ).



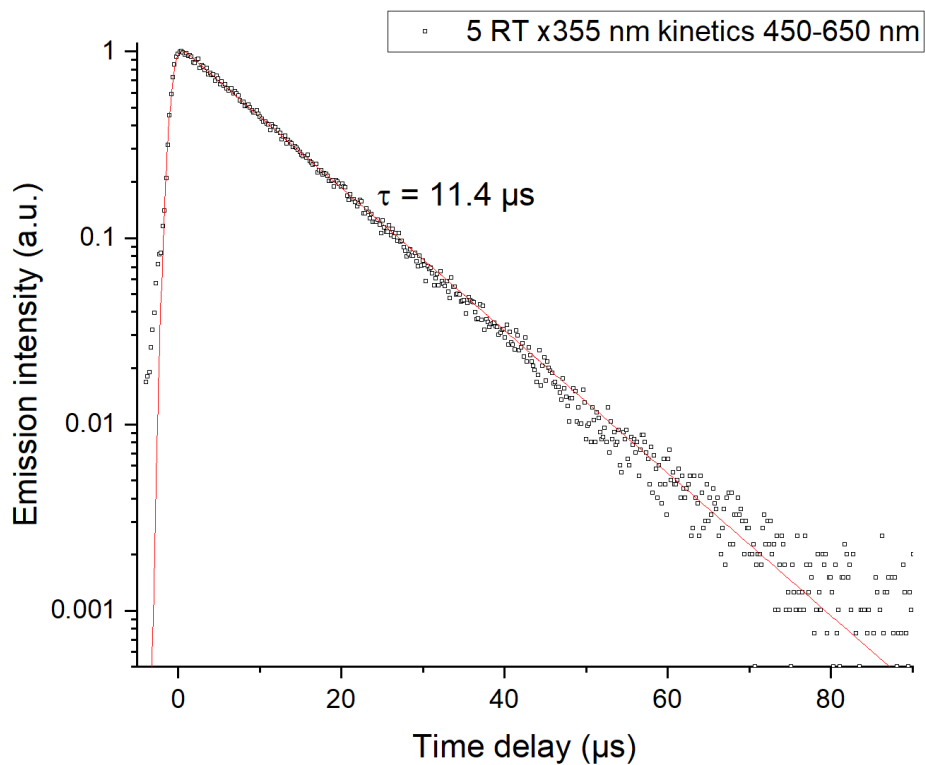

Figure S11. Luminescence decay for **5** in degassed dry  $\text{CHCl}_3$  at 293 K ( $\lambda_{\text{ex}}=355 \text{ nm}$ ).

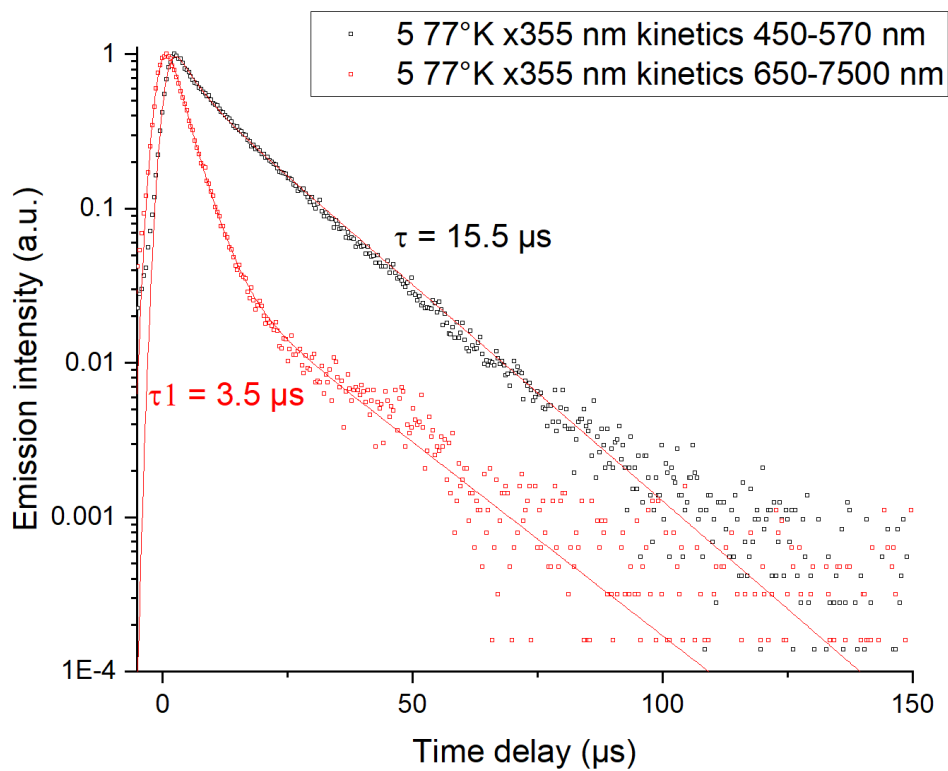

Figure S12. Luminescence decay for **5** in degassed dry  $\text{CHCl}_3$  at 77 K ( $\lambda_{\text{ex}}=355 \text{ nm}$ ).

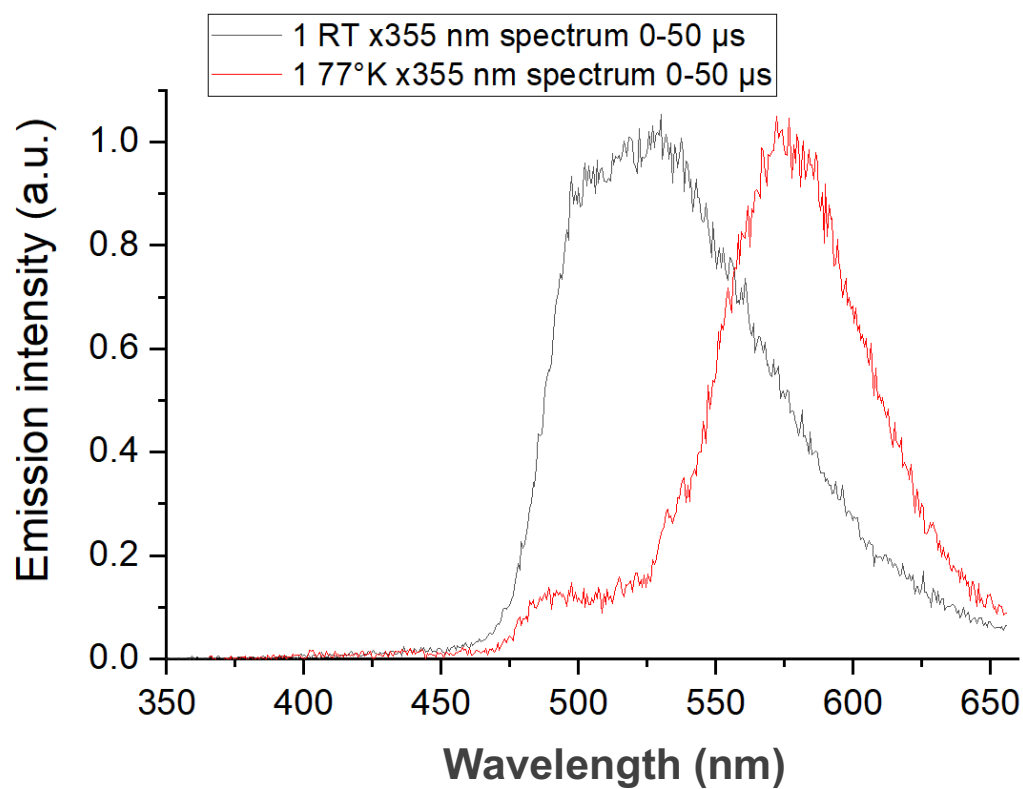

Figure S13. Emission of degassed solutions of **1** in  $\text{CHCl}_3$  at 293 and 77 K.

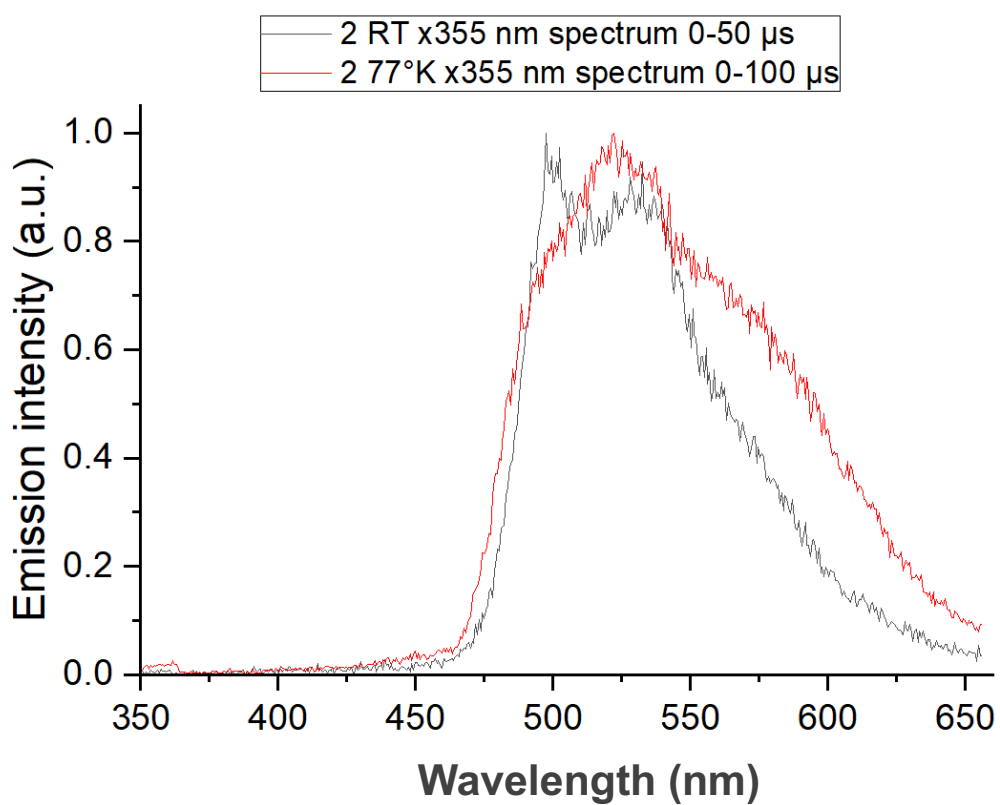

Figure S14. Emission of degassed solutions of **2** in  $\text{CHCl}_3$  at 293 and 77 K.

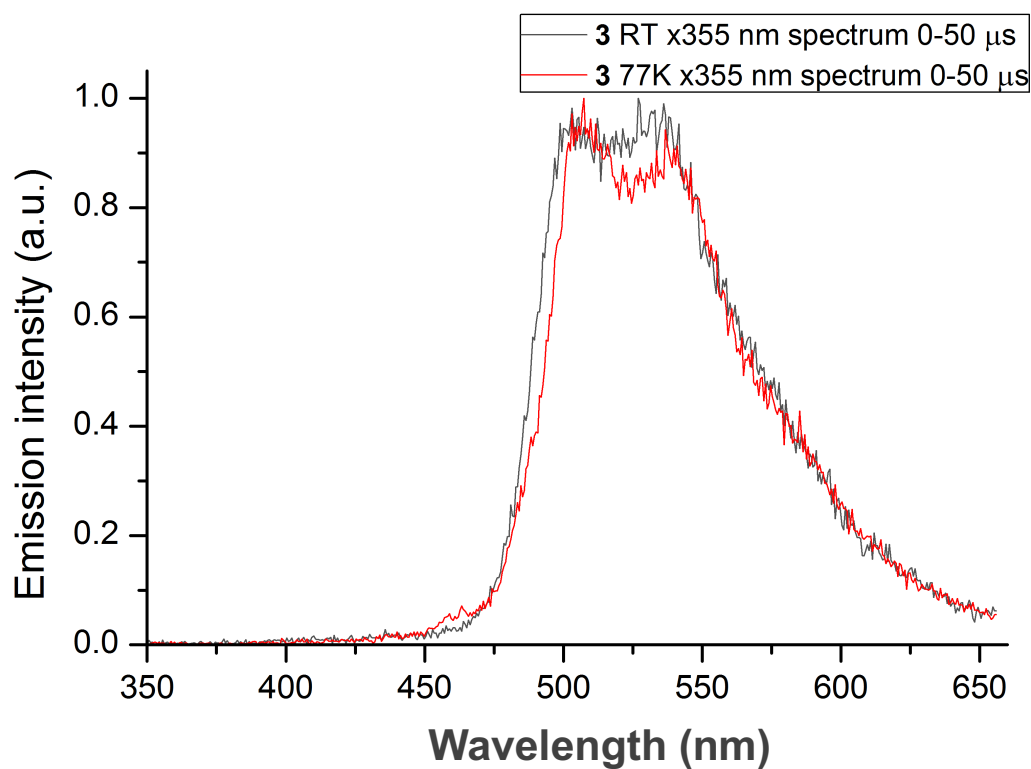

Figure S15. Emission of degassed solutions of **3** in CHCl<sub>3</sub> at 293 and 77 K.

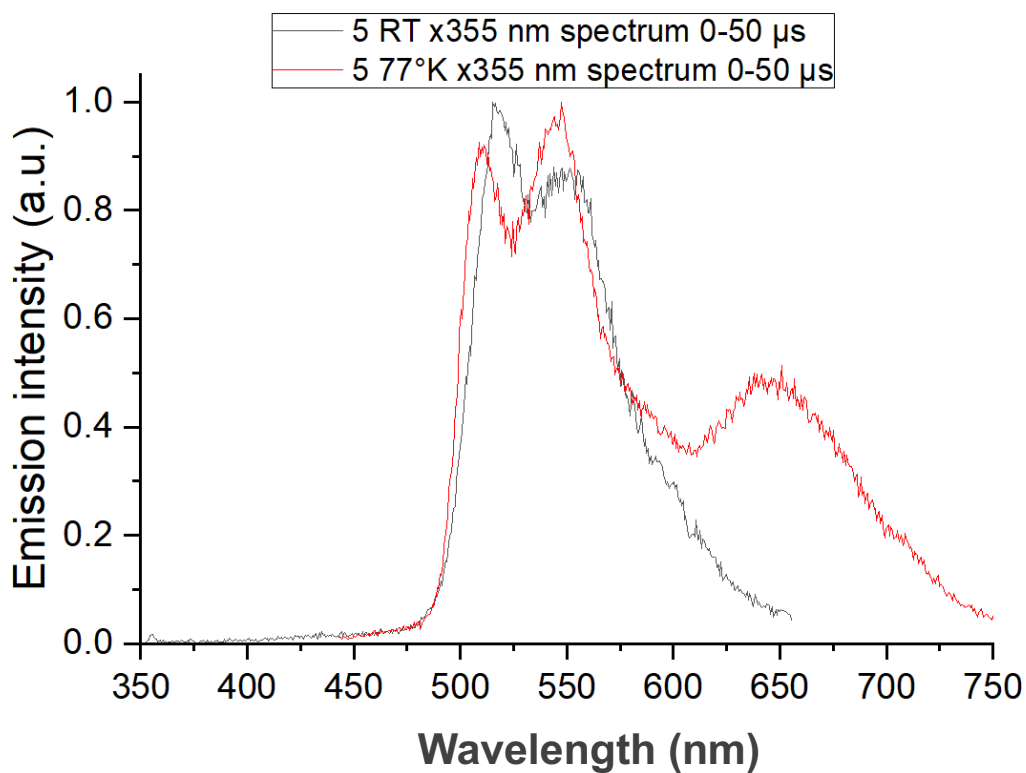

Figure S16. Emission of degassed solutions of **5** in CHCl<sub>3</sub> at 293 and 77 K.

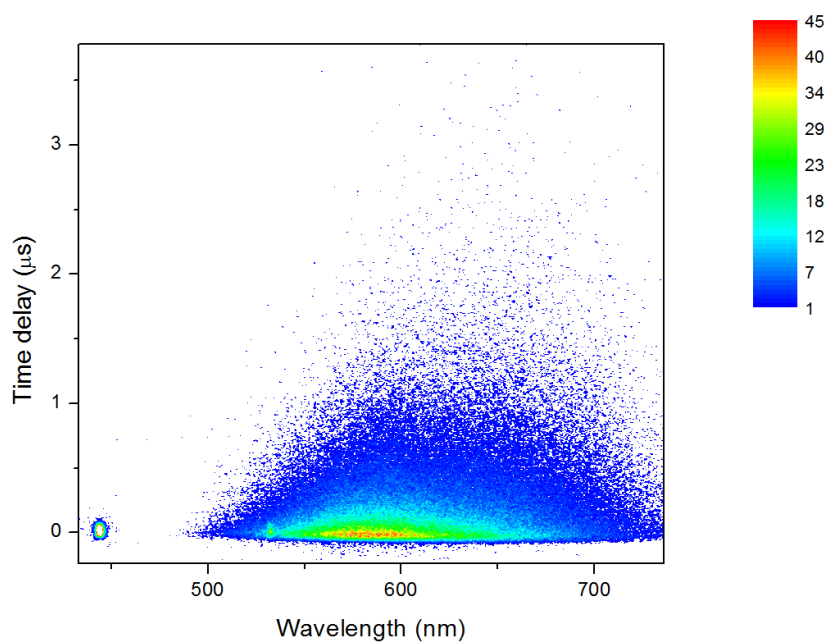

Figure S17. Emission of **1** in the solid state ( $\lambda_{\text{ex}} = 440 \text{ nm}$ ). Coloured scale bar corresponds to emission intensity (arbitrary units).

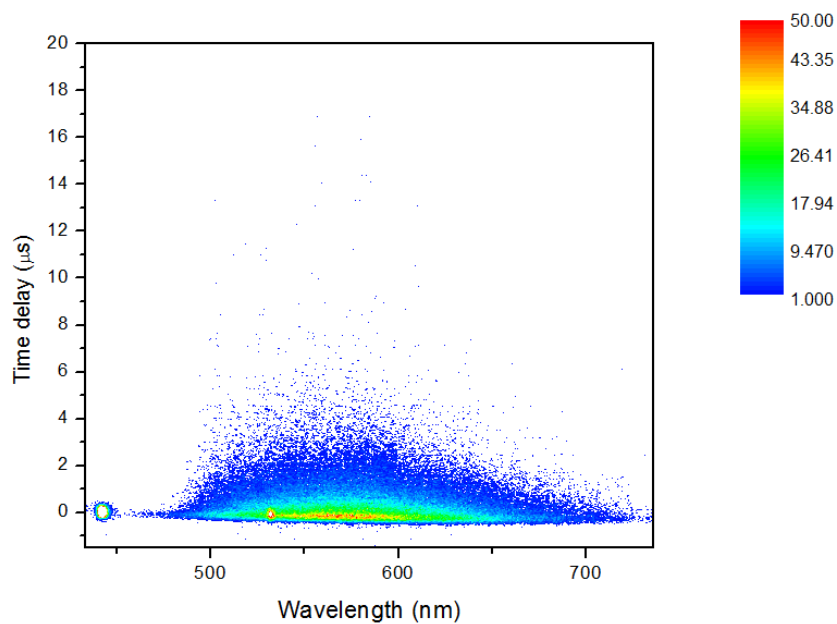

Figure S18. Emission of **2** in the solid state ( $\lambda_{\text{ex}} = 440 \text{ nm}$ ). Coloured scale bar corresponds to emission intensity (arbitrary units).

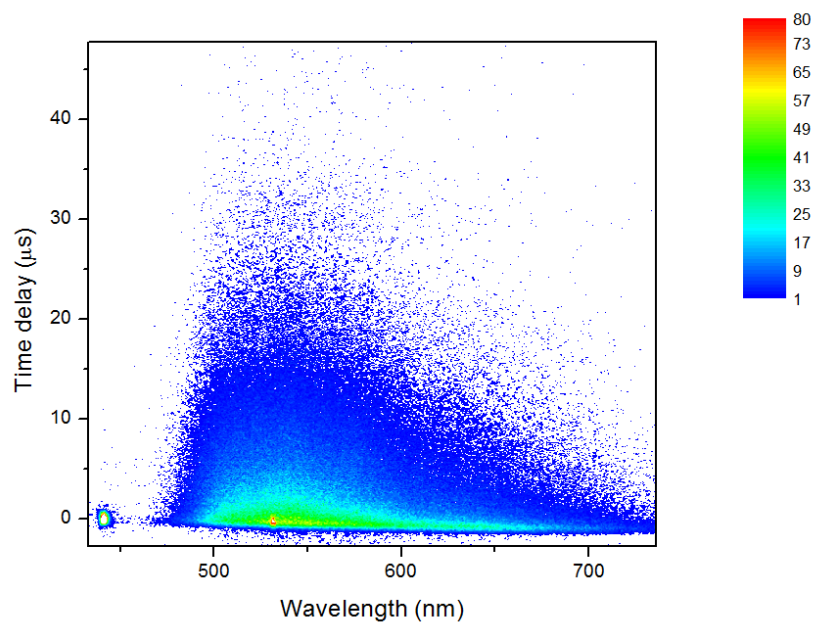

Figure S19. Emission of **3** in the solid state ( $\lambda_{\text{ex}} = 440 \text{ nm}$ ). Coloured scale bar corresponds to emission intensity (arbitrary units).

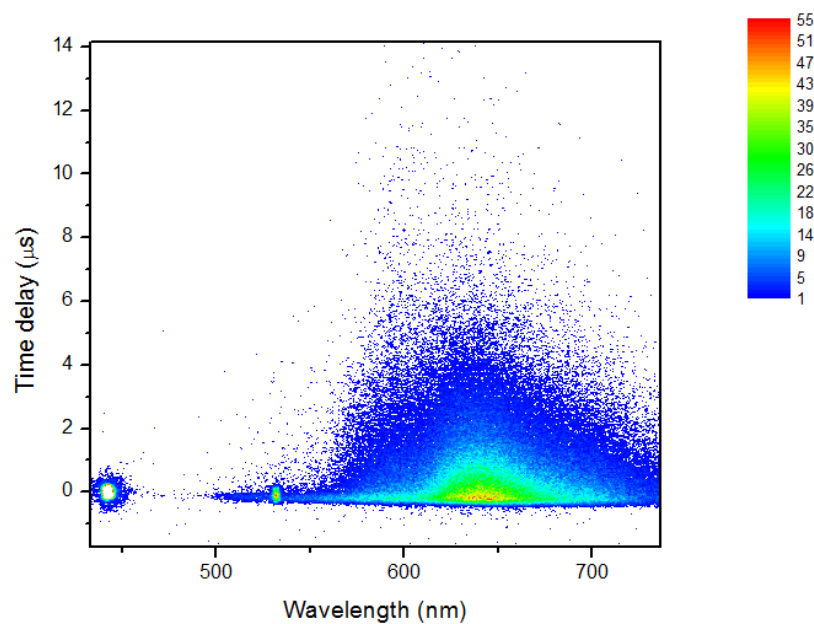

Figure S20. Emission of **5** in the solid state ( $\lambda_{\text{ex}} = 440 \text{ nm}$ ). Coloured scale bar corresponds to emission intensity (arbitrary units).

## NMR spectra of the compounds

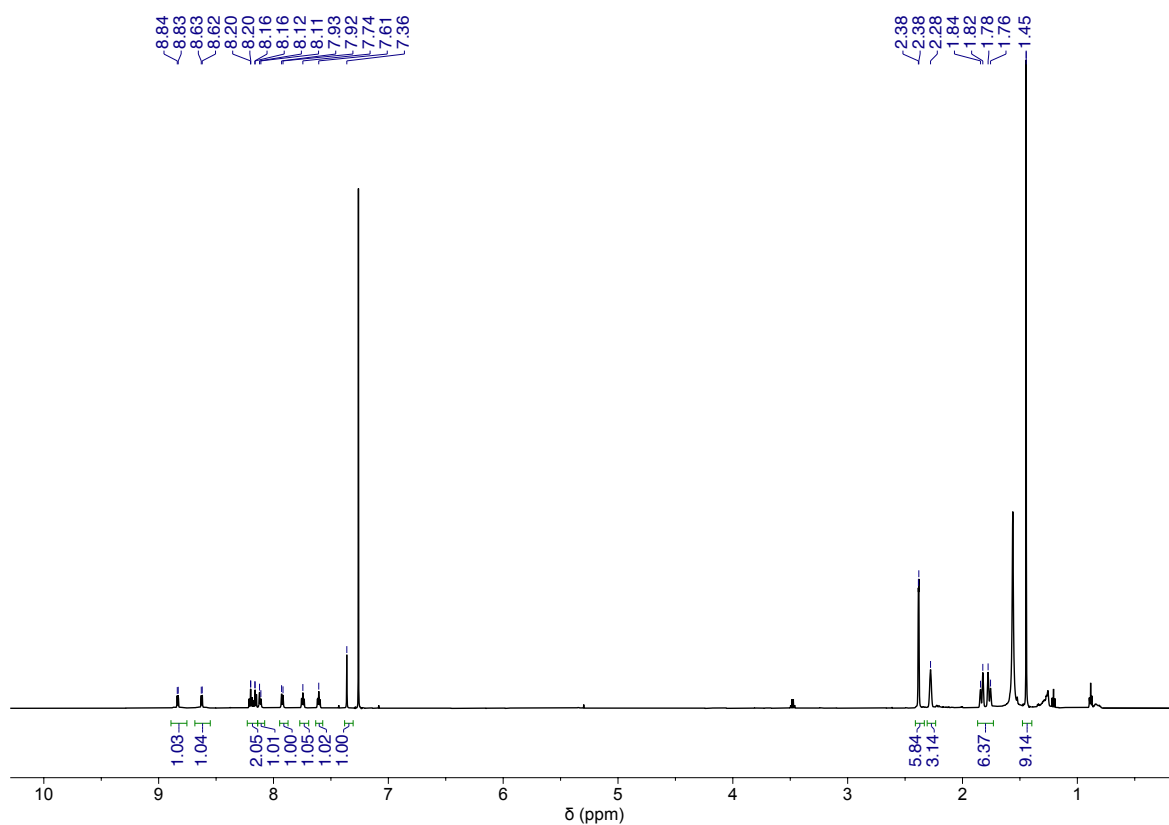

Figure S21.  $^1\text{H}$  NMR (400 MHz, 300 K) spectrum of complex **1** in  $\text{CDCl}_3$

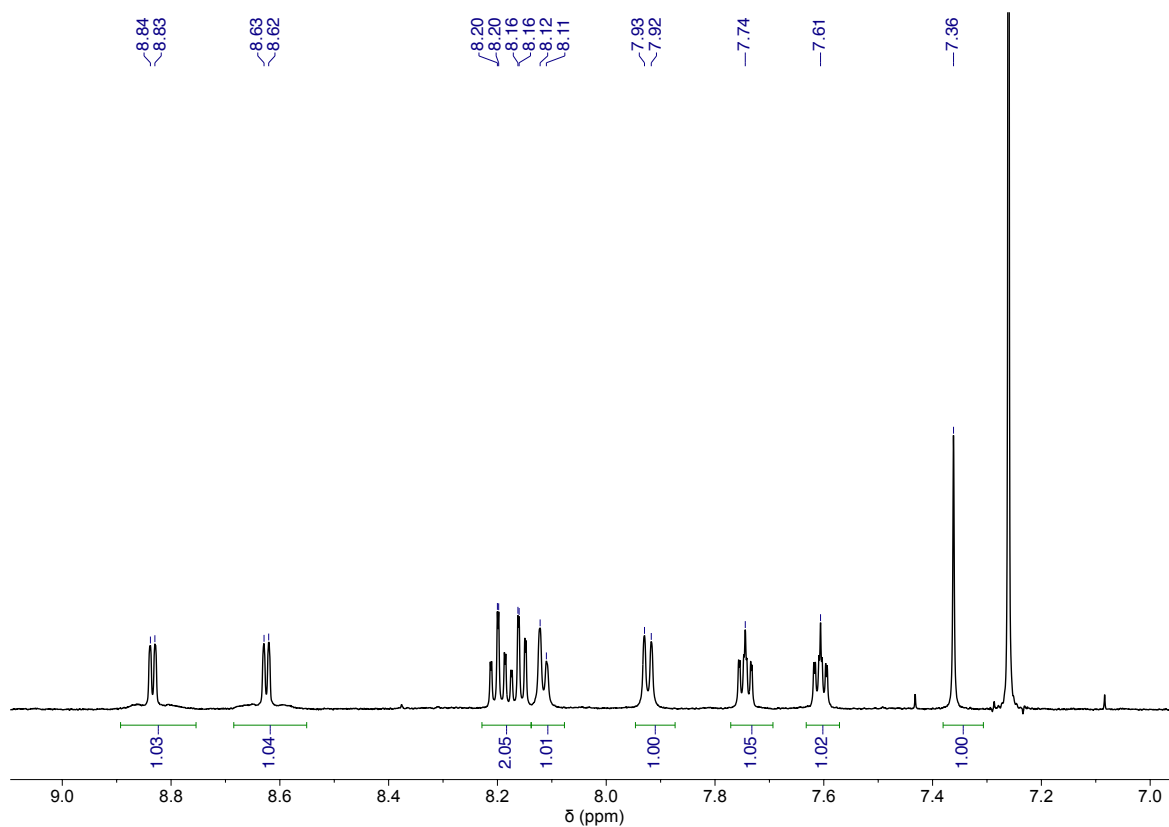

Figure S22. Aromatic region of  $^1\text{H}$  NMR (400 MHz, 300 K) spectrum of complex **1** in  $\text{CDCl}_3$

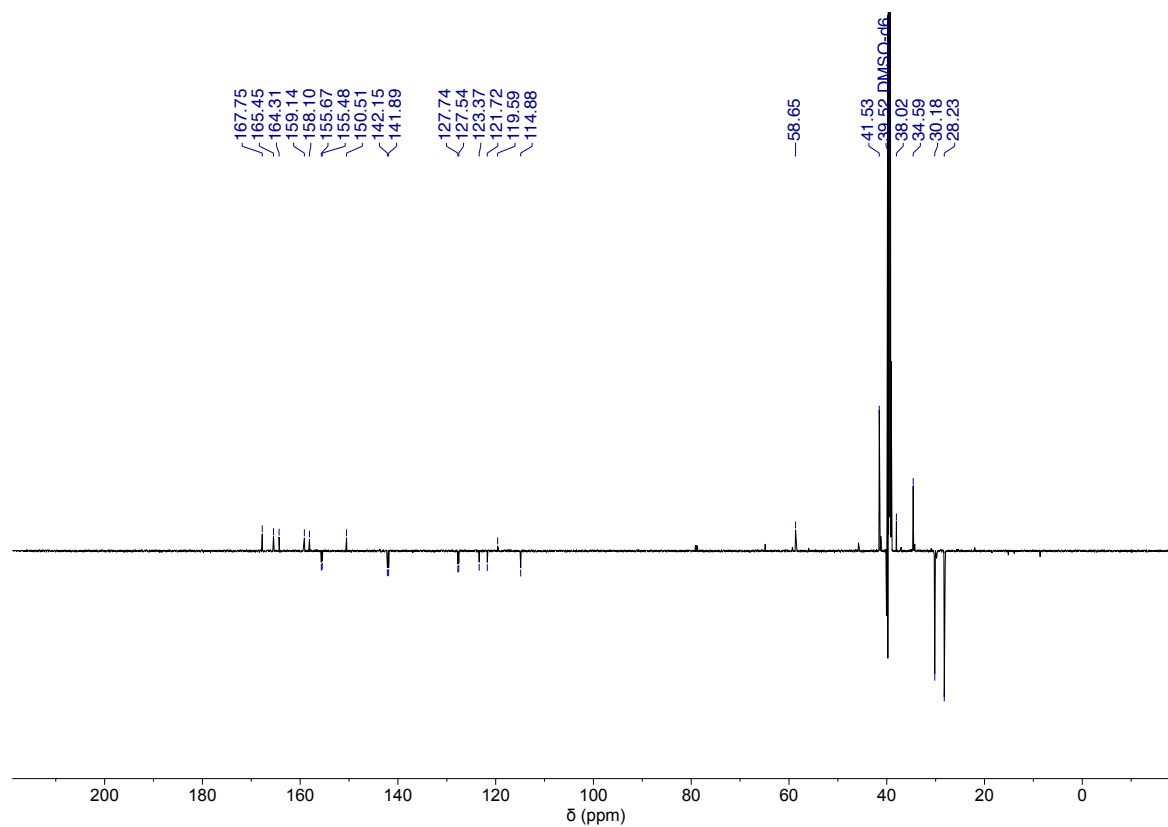

Figure S23.  $^{13}\text{C}$  Jmod NMR (151 MHz, 300 K) spectrum of complex **1** in  $\text{DMSO-}d_6$

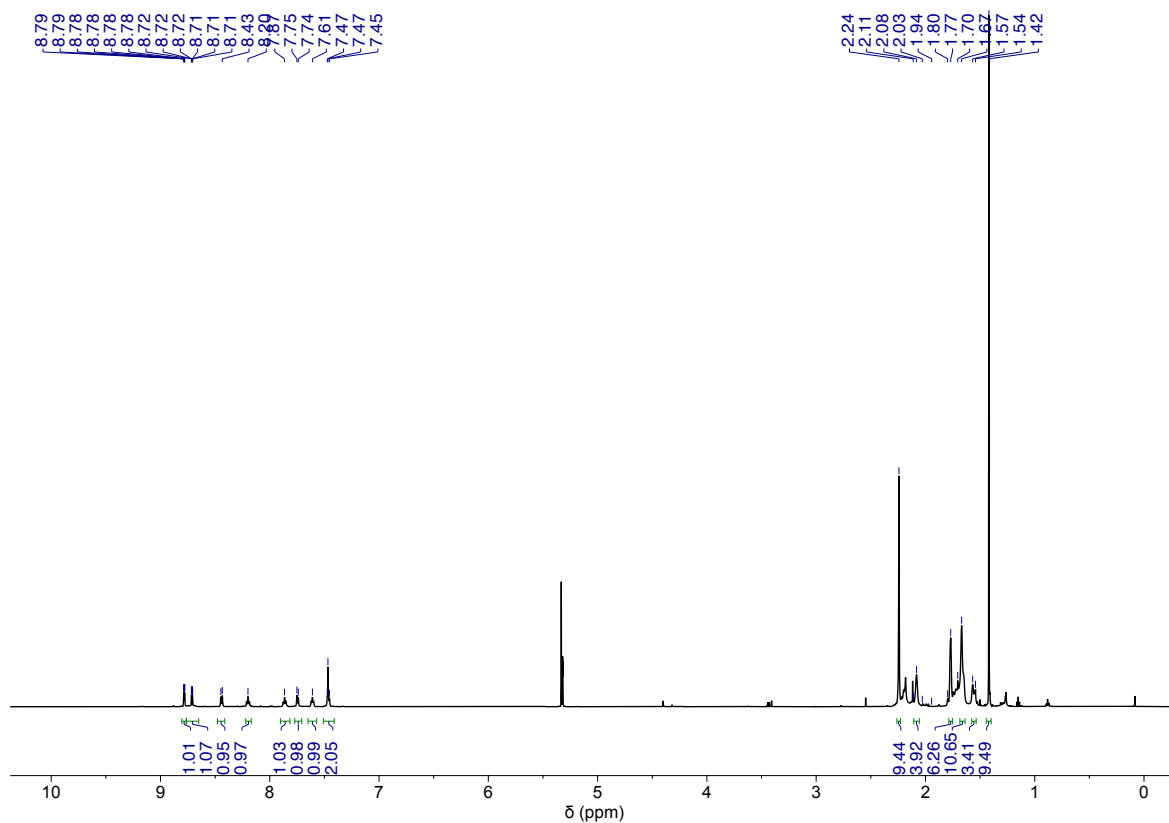

Figure S24.  $^1\text{H}$  NMR (600 MHz, 300 K) spectrum of complex **2** in  $\text{CD}_2\text{Cl}_2$

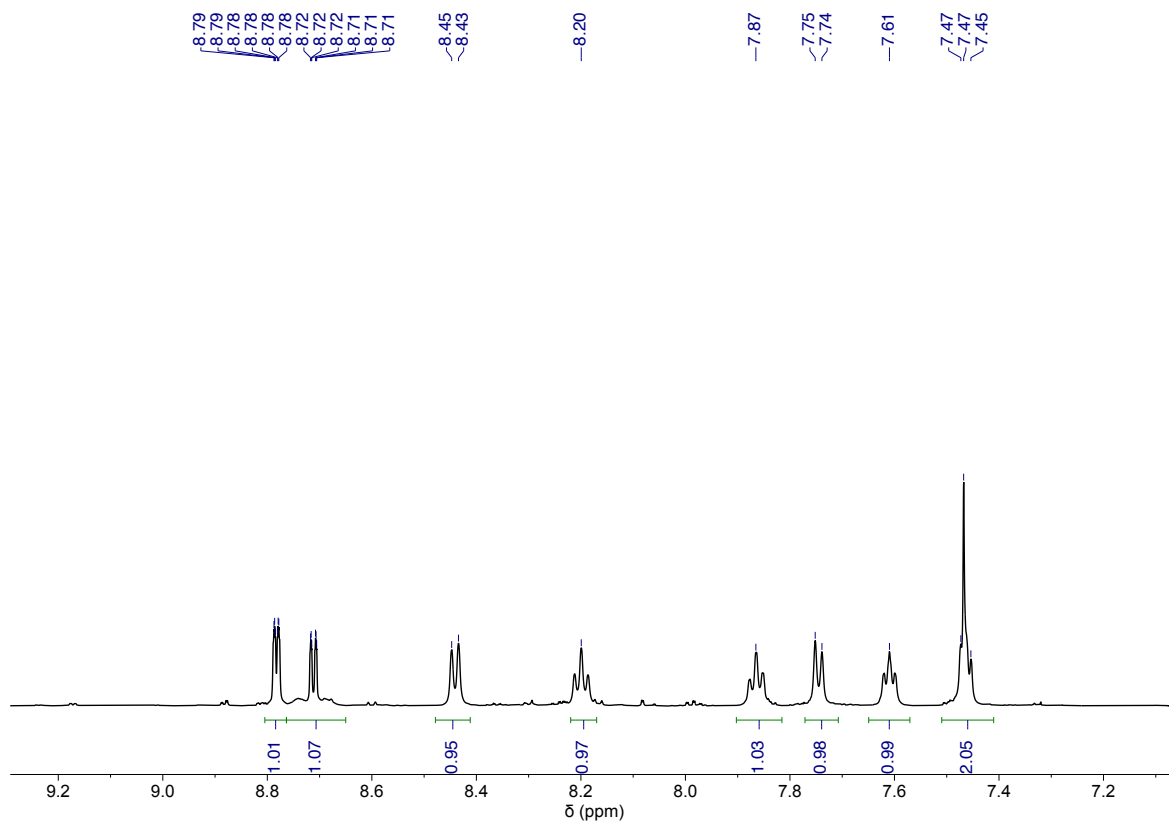

Figure S25. Aromatic region of  $^1\text{H}$  NMR (600 MHz, 300 K) spectrum of complex **2** in  $\text{CD}_2\text{Cl}_2$



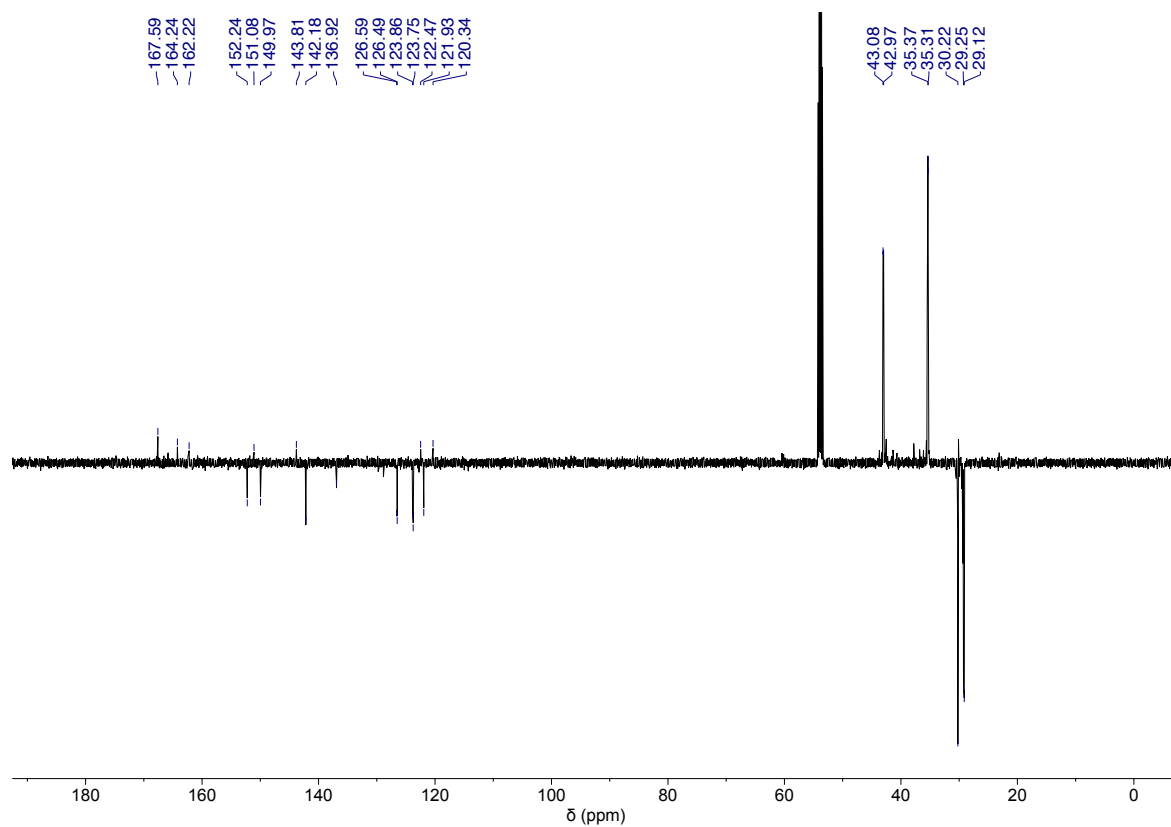

Figure S26.  $^{13}\text{C}$  Jmod NMR (151 MHz, 300 K) spectrum of complex **2** in  $\text{CD}_2\text{Cl}_2$

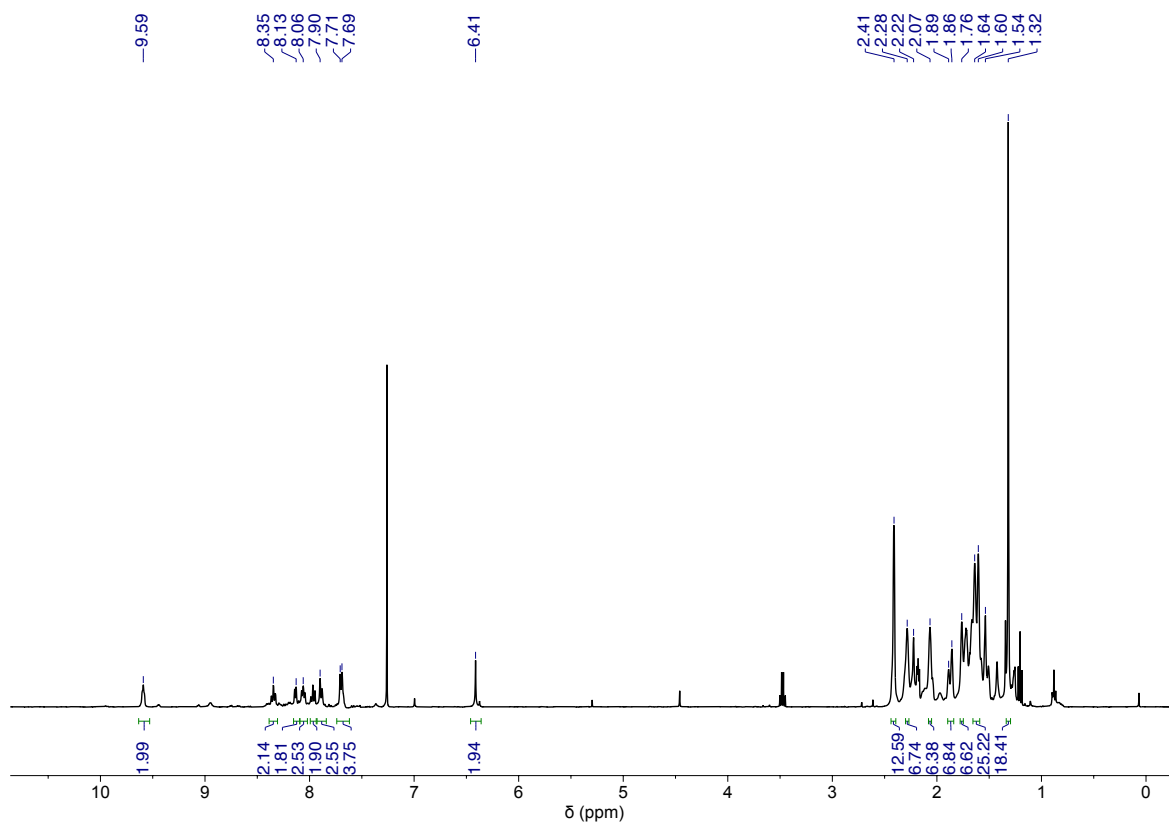

Figure S27.  $^1\text{H}$  NMR (400 MHz, 300 K) spectrum of complex **3** in  $\text{CDCl}_3$

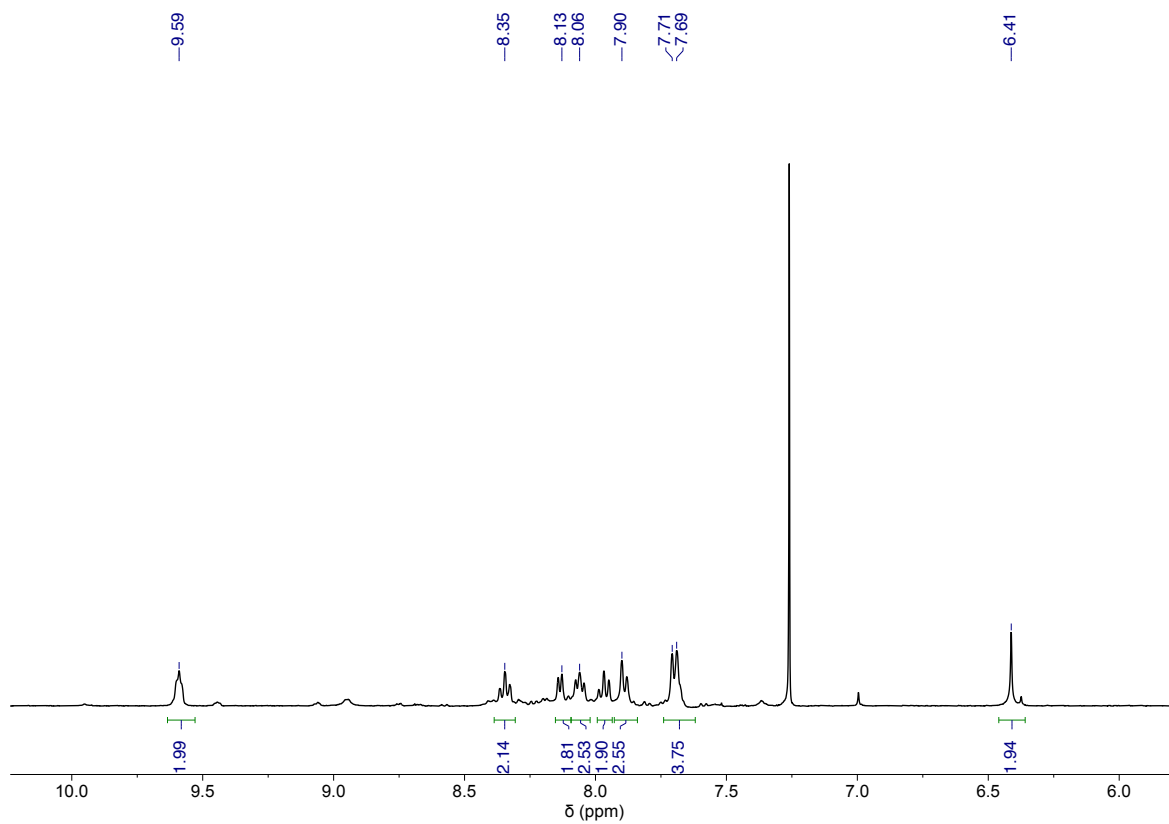

Figure S28. Aromatic region of  $^1\text{H}$  NMR (400 MHz, 300 K) spectrum of complex **3** in  $\text{CDCl}_3$

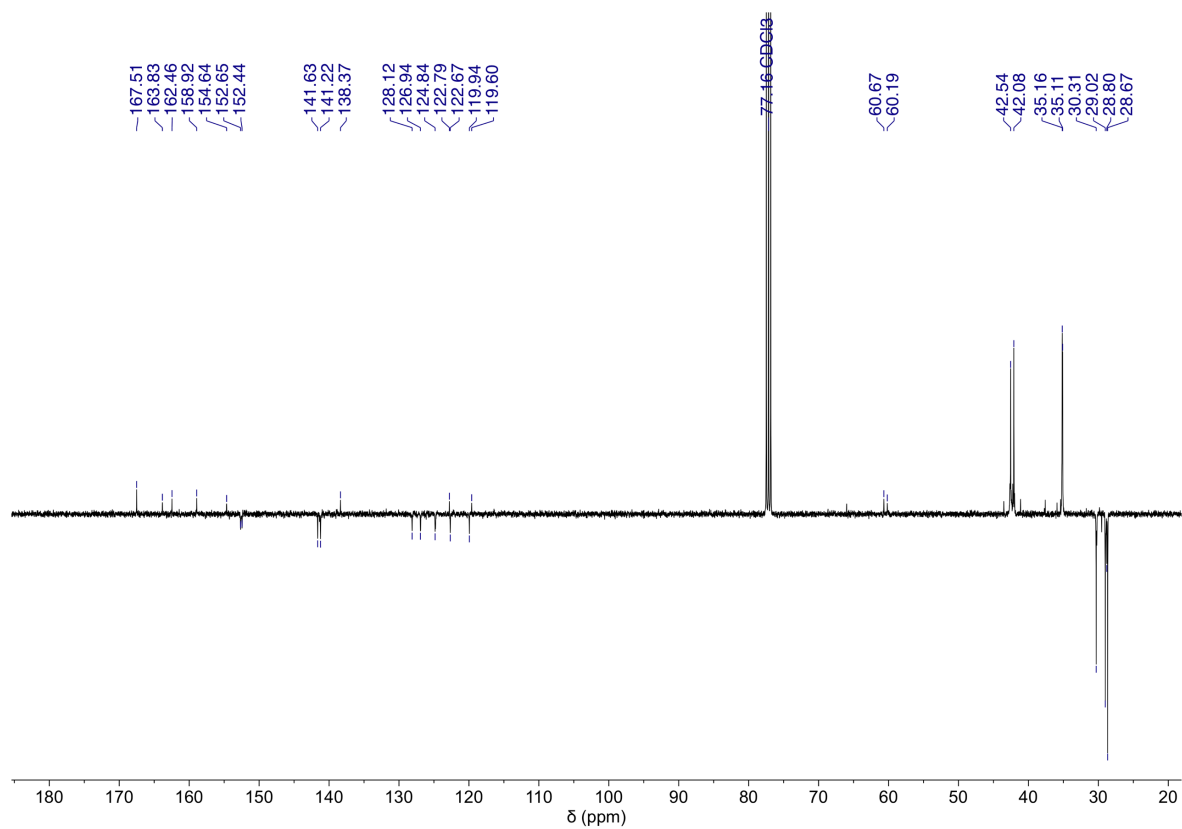

Figure S29. <sup>13</sup>C Jmod NMR (100 MHz, 300 K) spectrum of complex **3** in CDCl<sub>3</sub>

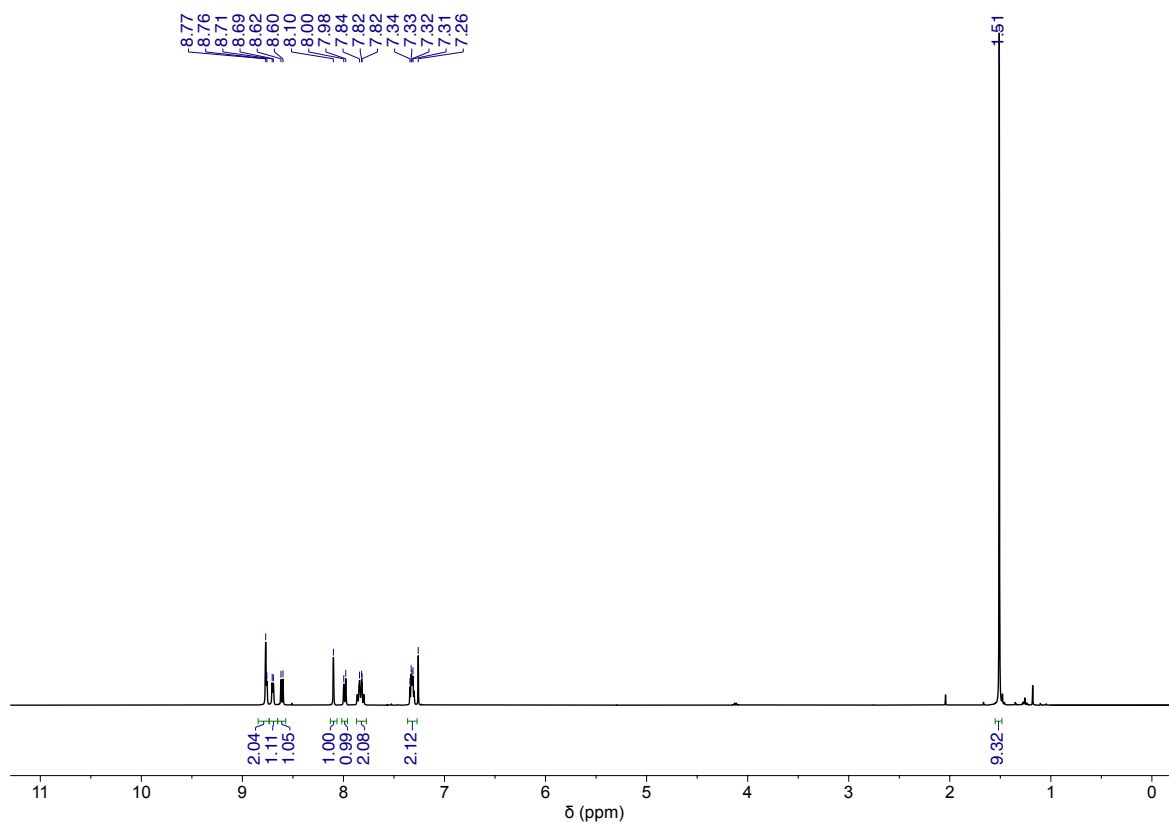

Figure S30.  $^1\text{H}$  NMR (400 MHz, 300 K) spectrum of ligand **4b** in  $\text{CDCl}_3$

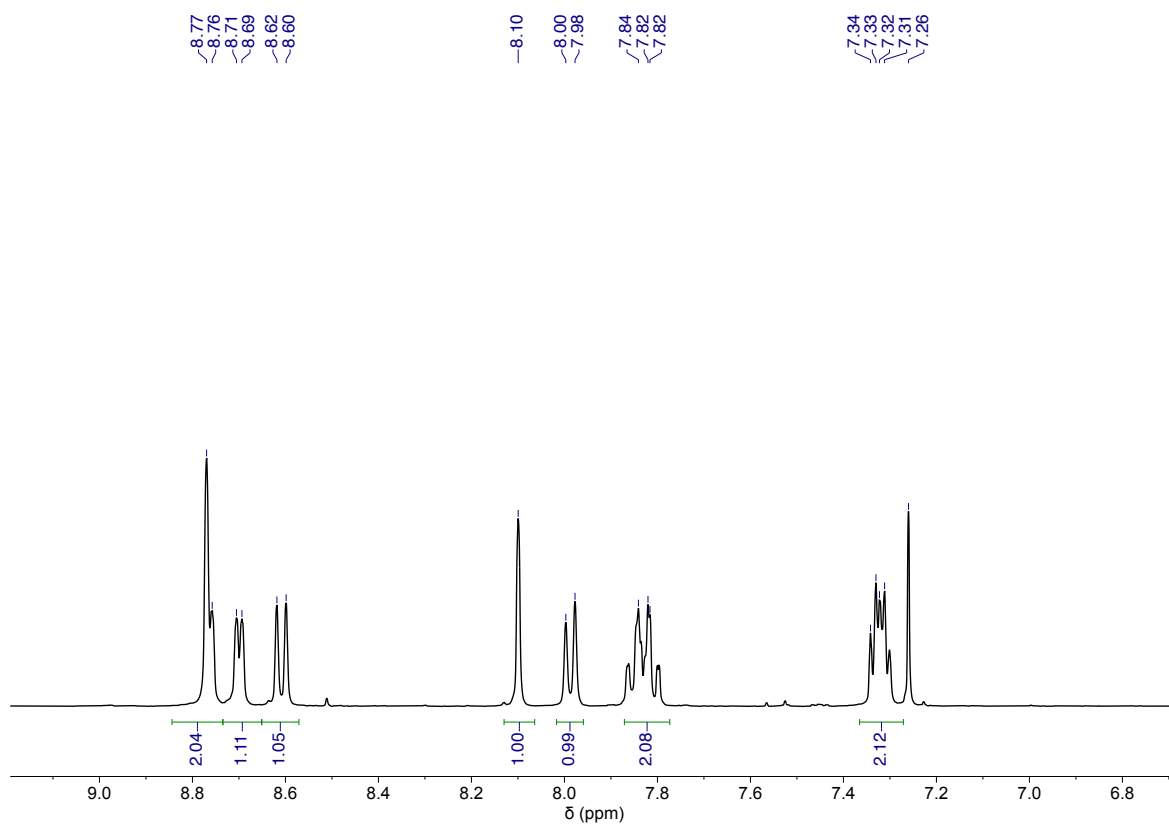

Figure S31. Aromatic region of  $^1\text{H}$  NMR (400 MHz, 300 K) spectrum of ligand **4b** in  $\text{CDCl}_3$

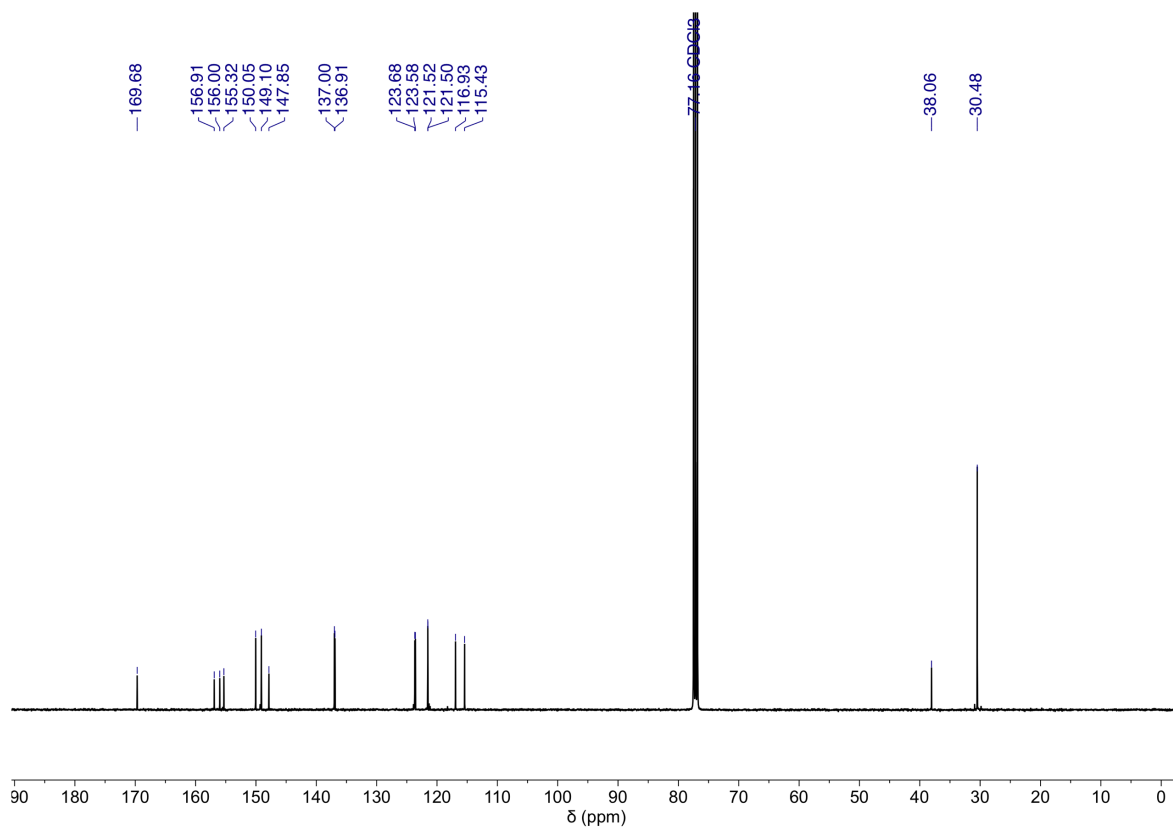

Figure S32.  $^{13}\text{C}$  NMR (100 MHz, 300 K) spectrum of ligand **4b** in  $\text{CDCl}_3$

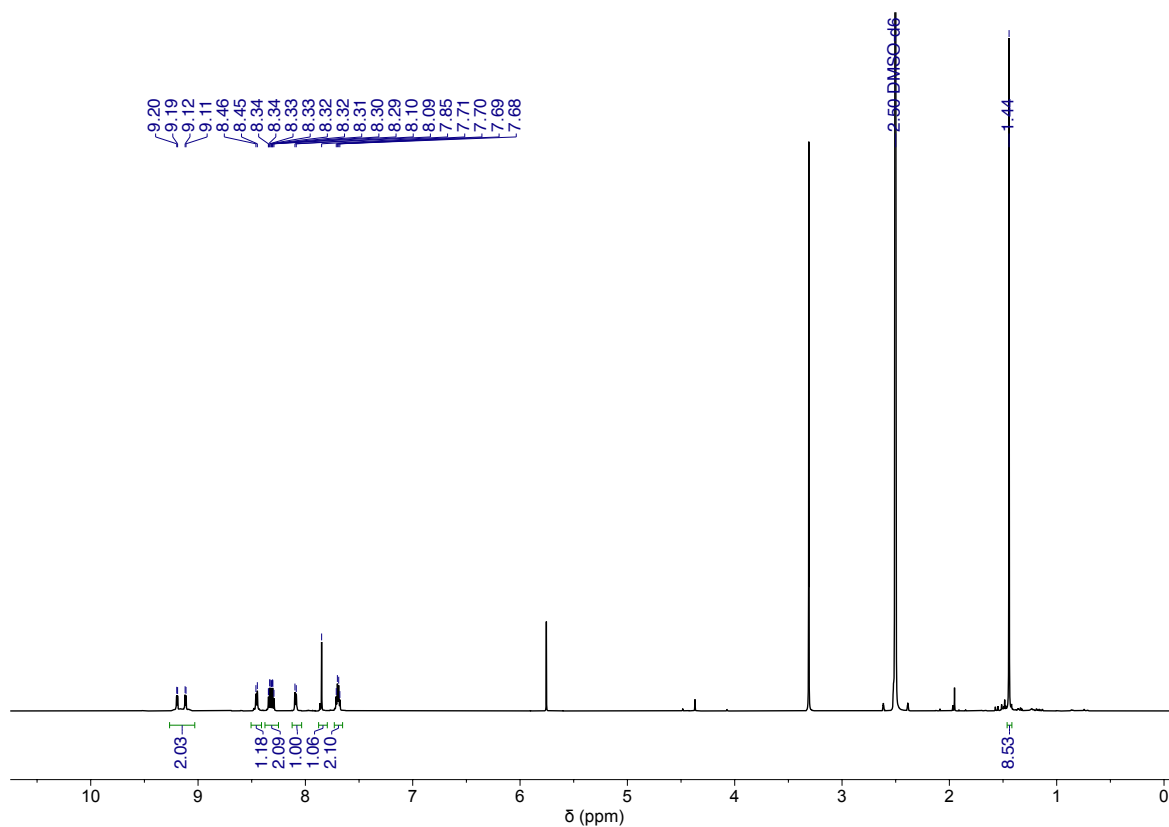

Figure S33.  $^1\text{H}$  NMR (400 MHz, 300 K) spectrum of complex **5** in  $\text{DMSO-}d_6$

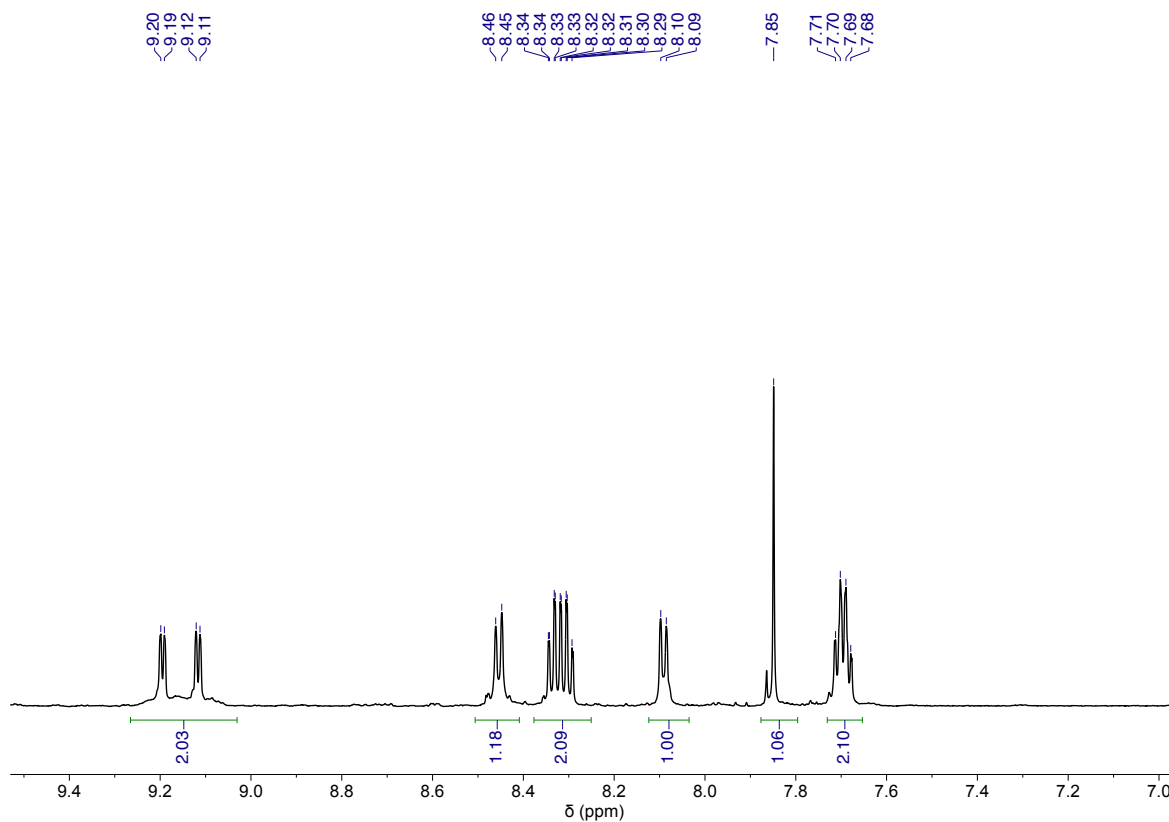

Figure S34. Aromatic region of  $^1\text{H}$  NMR (400 MHz, 300 K) spectrum of complex **5** in  $\text{DMSO-}d_6$

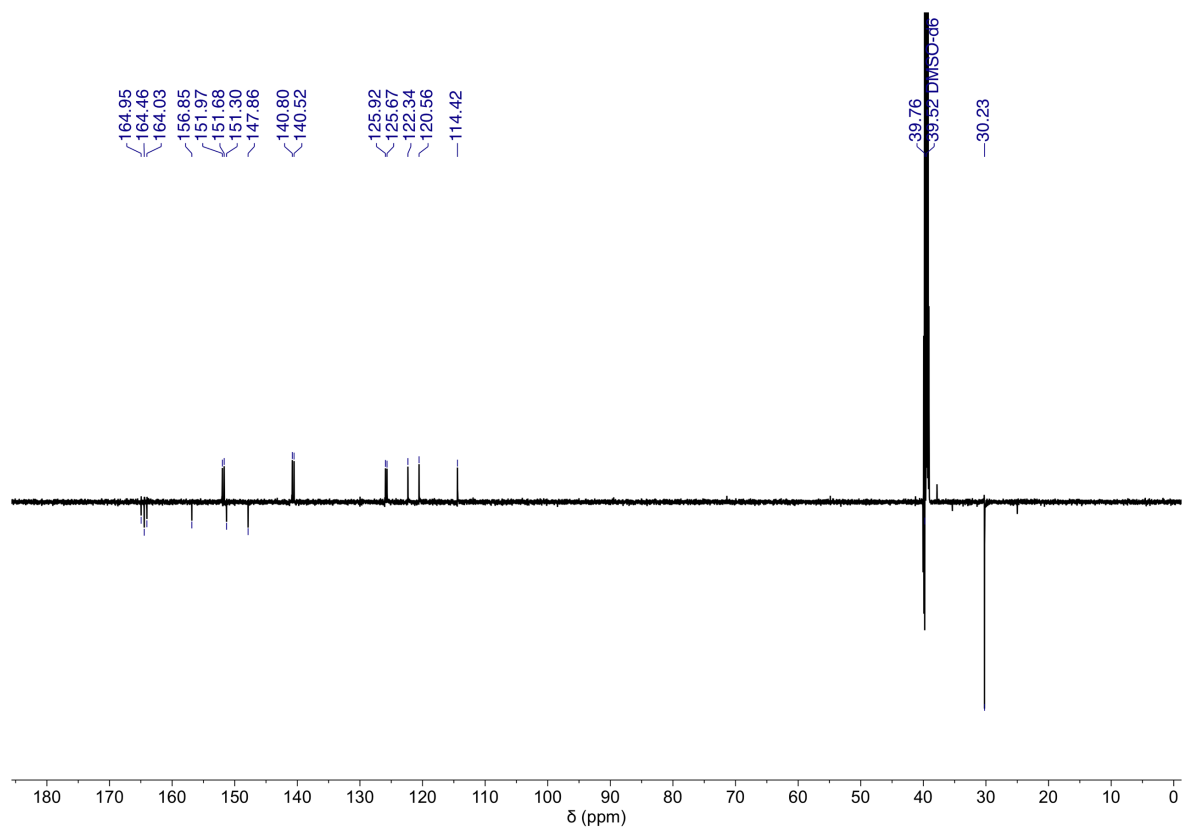

Figure S35.  $^{13}\text{C}$  NMR (100 MHz, 300 K) spectrum of ligand **5** in  $\text{DMSO-}d_6$
